# Supplementary material
Source: publisher site journal article supplement (https://www.dovepress.com/article/441457)
Supplement: Supplementary file 1 [file get_supplementary_file.php]

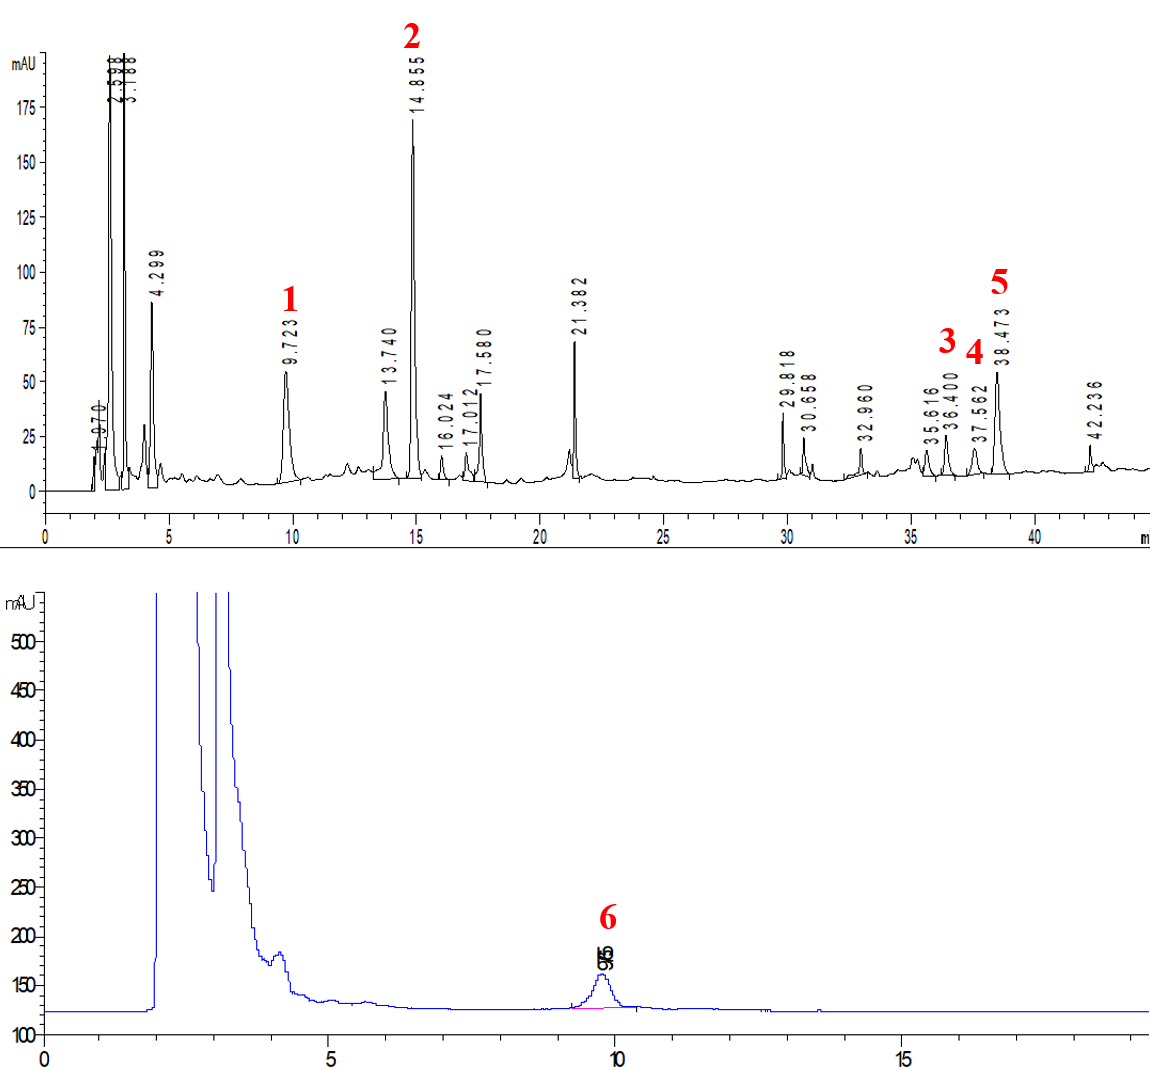


**Supplementary Figure 1 The HPLC of the JTD deccotion.** The numbers shown in the chromatograms indicate the peaks of calycosin-7-O-β-D-glucoside (1), salvianolic acid B (2), coptisine (3), palmatine (4), berberine (5) and timosaponin BII (6).

| **Supplementary Table 1. Composition of JTD** | | | | |
| --- | --- | --- | --- | --- |
| **Species** | **Chinese name** | **Plant part** | **Family** | **Mass(g)** |
| Euphorbia humifusa Willd | Dijincao | Leaf | Euphorbiaceae | 15 |
| Salvia miltiorrhiza Bunge | Danshen | Root | Lamiaceae | 20 |
| Astragalus mongholicus Bunge | Huagnqi | Root | Leguminosae | 10 |
| Anemarrhena asphodeloides Bunge | Zhimu | Root | Asparagaceae | 10 |
| Coptis chinensis Franch | Huanglian | Root | Ranunculaceae | 5 |
| Total amount |  |  |  | 60 |

| **Supplementary Table 2. HPLC quantificates the main component of JTD** | |
| --- | --- |
| **Component** | **Ratio (mg/g JTD)** |
| Calycosin-7-O-β-D-glucoside | 0.06 |
| Salvianolic acid B | 8.49 |
| Quercetin | 0.04 |
| Coptisine | 6.07 |
| Palmatine | 0.26 |
| Berberine | 1.09 |
| Timosaponin BII | 0.66 |
